# Supplementary material for: Ubiquitination of secretory granules promotes their crinophagic degradation in Drosophila
Source: Research Square preprint supplement (doi:10.21203/rs.3.rs-8562019/v1), 2026-01-30
Supplement: Supplementary file 1 [file 6dca5713c1310e106639a9b4.docx]

Title

**Ubiquitination of secretory granules promotes crinophagic degradation in *Drosophila***

Authors

Tamás Csizmadia1🖂, Anna Dósa1,2, Asha Kiran Maddali3,4, András Jipa4, Hajnalka Laczkó-Dobos4, Péter Lőw1* and Gábor Juhász1,4*🖂

Affiliations

1Department of Anatomy, Cell and Developmental Biology, Eötvös Loránd University, Budapest, Hungary

2Research Institute of Molecular Pathology (IMP), Vienna BioCenter PhD Program

3Heidelberg UniversityBiochemistry Center (BZH), Heidelberg, Germany

4Institute of Genetics, HUN-REN Biological Research Centre, Szeged, Hungary

*These authors contributed equally

Contact information:

🖂Corresponding authors: [tamas.csizmadia@ttk.elte.hu](mailto:tamas.csizmadia@ttk.elte.hu); gabor.juhasz@ttk.elte.hu

Running title:

Secretory granule ubiquitination triggers crinophagy

**SUPPLEMENTARY MATERIALS**

**
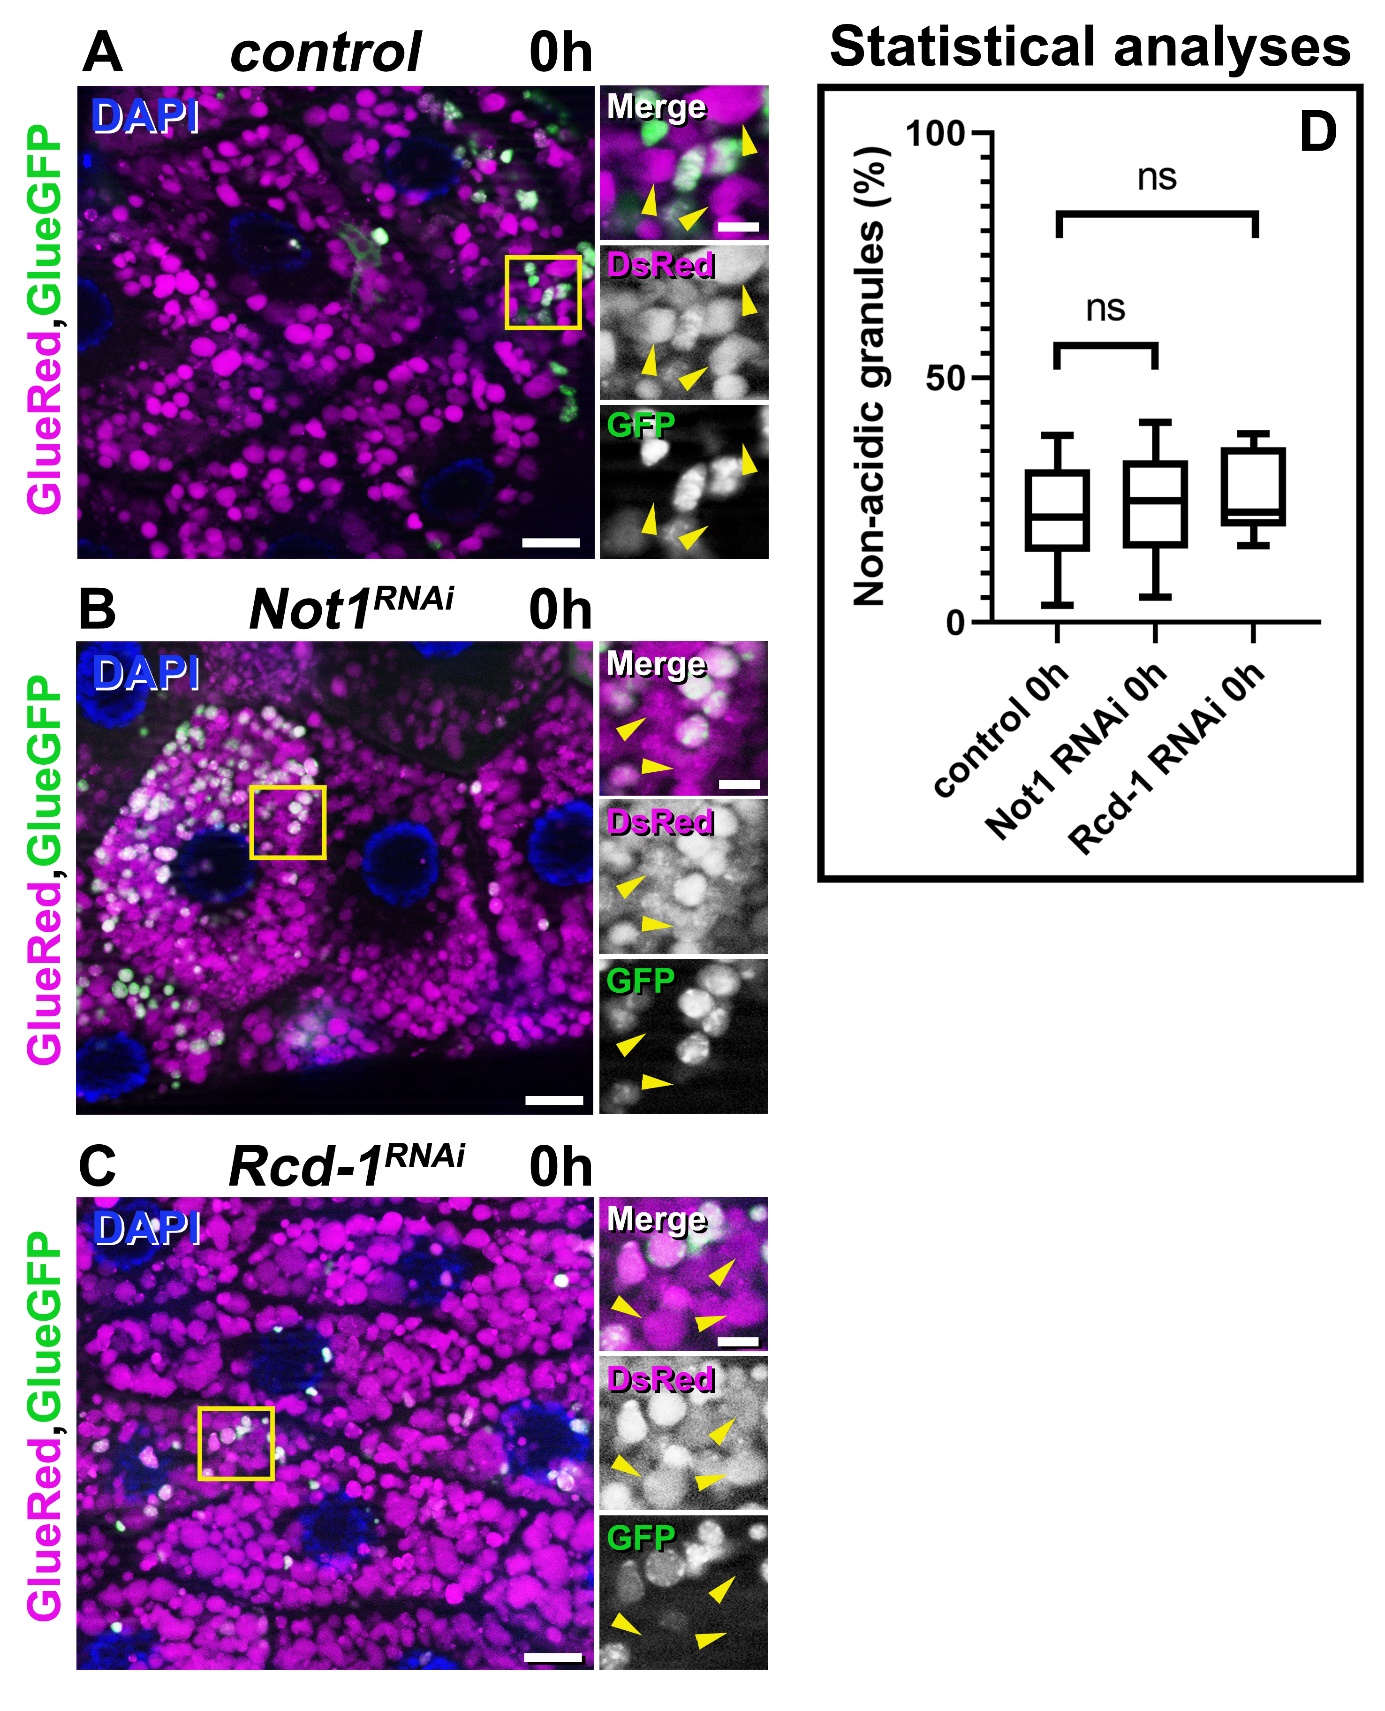
**

**Figure S1. Silencing genes encoding subunits of the CCR4-CNOT complex other than Cnot1 does not influence glue granule acidification**

(**A-D**) Prepupal salivary gland cells co-expressing glue-GFP and glue-DsRed reporters and transgenic RNA interference constructs for genes encoding subunits of the CCR4-CNOT complex. Salivary gland-specific knockdown of *Not1* (**B**) or *Rcd-1* (**C**) did not disrupt the developmentally programmed quenching of GFP fluorescence within glue granules: these are similar to control cells (**A,** yellow arrowheads). (**D)** Quantification of data from **A-C**, n=6-9 animals, Mann-Whitney tests. P values are (ns) p=0.6842 and (ns) p=0.3527, respectively.


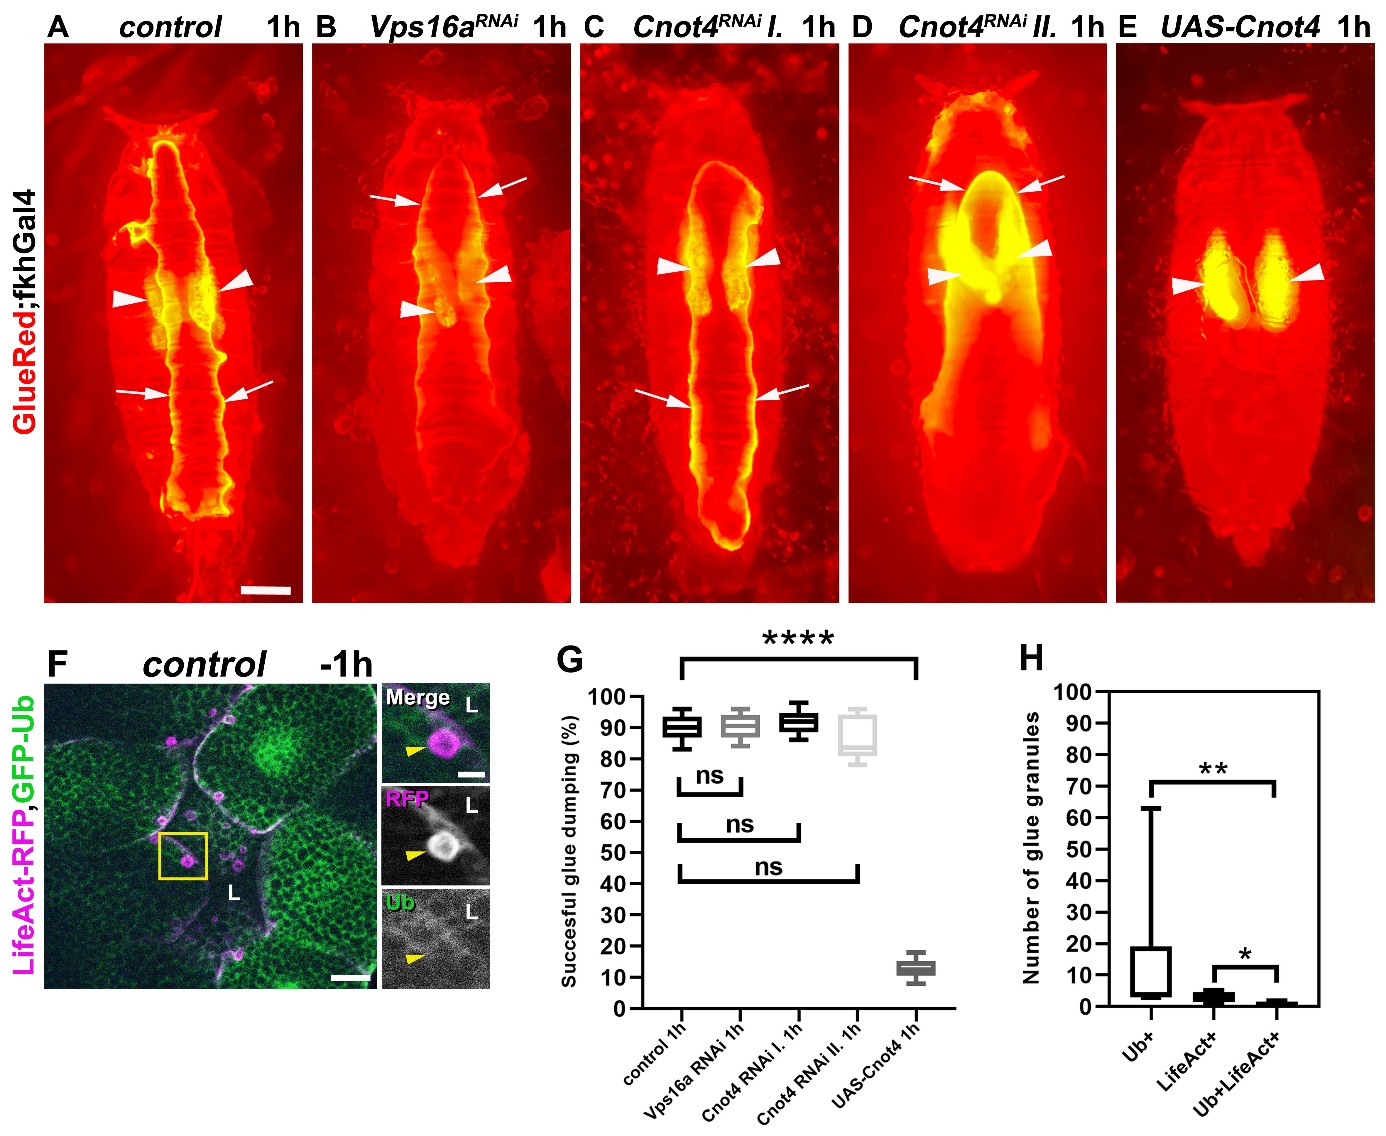


**Figure S2. Ubiquitin is not required for normal glue release from the salivary gland, while premature crinophagy induced by Cnot4 overexpression prevents glue secretion**

(A-E) Secretion assays using glue-DsRed animals in different genetic background. (**A**) Control animals display an obvious glue-DsRed patch under the prepupa (white arrows denote the border of the glue patch), which indicate the successful glue secretion and release from the salivary gland (glands are marked by white arrowheads). Silencing of the crinophagic gene *Vps16a* (B) or *Cnot4* *(Cnot4 RNAi I -* **C** *and II -* **D***)* did not perturb the salivary gland’s secretory process. Importantly, the overexpression of Cnot4 protein clearly results in strong defects in glue release from the gland (**E**). (G) Quantification of data from panels A-E (**G**) was performed on samples from 300 animals using Mann-Whitney tests. P values are **** p<0.0001.

(**F**) Ubiquitin does not colocalize with the exocytotic marker LifeAct-Ruby on glue granules in the salivary gland cells from the secretion period. The large LifeAct-Ruby positive structures are glue granules undergoing exocytosis [8,9], but they exhibit no GFP-Ub signal (yellow arrowheads). Sec: secretion period, L: lumen. (**H**) Quantification of data of panel F, n=6-8 animals, Mann-Whitney tests. P values are **p<0.0022 and *p<0.0108.

**Table S1.** Results of the RNAi screen of the *Drosophila* E3 enzyme encoding genes.

| **Potential *Drosophila* E3 Ub ligases examined in this study** | | | | | | |
| --- | --- | --- | --- | --- | --- | --- |
| ***Type of E3 enzyme/domain*** | ***Number*** | ***Name or CG number*** | ***RNAi line*** | ***Source*** | ***Crinophagy status*** | ***Other comment*** |
| **Goliath type** | 1 | gol | [2679R-2](https://shigen.nig.ac.jp/fly/nigfly/rnaiDetailAction.do?input=sr&stockId=2679R-2) | NigFly | no effect | — |
| 2 | gzl | [10277R-3](https://shigen.nig.ac.jp/fly/nigfly/rnaiDetailAction.do?input=sr&stockId=10277R-3) | NigFly | no effect | — |
| **HECT type** | 3 | CG3356 | [3356R-1](https://shigen.nig.ac.jp/fly/nigfly/rnaiDetailAction.do?input=sr&stockId=3356R-1) | NigFly | no effect | — |
| 4 | CG4238 | v41982 | VDRC | no effect | — |
| 5 | CG5087 | [5087R-3](https://shigen.nig.ac.jp/fly/nigfly/rnaiDetailAction.do?input=sr&stockId=5087R-3) | NigFly | no effect | — |
| 6 | CG42797 | [3003Ra-4](https://shigen.nig.ac.jp/fly/nigfly/rnaiDetailAction.do?input=sr&stockId=3003Ra-4) | NigFly | no effect | — |
| 7 | ctrip | [HMS00322](https://shigen.nig.ac.jp/fly/nigfly/tripDetailAction.do?input=sr&tripNo=HMS00322) | NigFly | no effect | — |
| 8 | HERC2 | [11734R-3](https://shigen.nig.ac.jp/fly/nigfly/rnaiDetailAction.do?input=sr&stockId=11734R-3) | NigFly | no effect | — |
| 9 | Herc4 | v37220 | VDRC | no effect | — |
| 10 | HUWE1 | [8184R-1](https://shigen.nig.ac.jp/fly/nigfly/rnaiDetailAction.do?input=sr&stockId=8184R-1) | NigFly | no effect | — |
| 11 | hyd | [9484R-2](https://shigen.nig.ac.jp/fly/nigfly/rnaiDetailAction.do?input=sr&stockId=9484R-2) | NigFly | no effect | small salivary glands and granules |
| 12 | Nedd4 | [7555R-3](https://shigen.nig.ac.jp/fly/nigfly/rnaiDetailAction.do?input=sr&stockId=7555R-3) | NigFly | no effect | — |
| 13 | Smurf | [4943R-2](https://shigen.nig.ac.jp/fly/nigfly/rnaiDetailAction.do?input=sr&stockId=4943R-2) | NigFly | no effect | — |
| 14 | Su(dx) | [4244R-1](https://shigen.nig.ac.jp/fly/nigfly/rnaiDetailAction.do?input=sr&stockId=4244R-1) | NigFly | no granules | very small salivary gland |
| 15 | Ube3a | 31972 | BDSC | no effect | — |
| 16 | Ufd4 | [5604R-3](https://shigen.nig.ac.jp/fly/nigfly/rnaiDetailAction.do?input=sr&stockId=5604R-3) | NigFly | persisting GFP | — |
| **IAP type** | 17 | Diap1 | [12284R-2](https://shigen.nig.ac.jp/fly/nigfly/rnaiDetailAction.do?input=sr&stockId=12284R-2) | NigFly | no effect | — |
| 18 | Diap2 | [8293R-1](https://shigen.nig.ac.jp/fly/nigfly/rnaiDetailAction.do?input=sr&stockId=8293R-1) | NigFly | no effect | — |
| **Kcmf1 type** | 19 | CG3526 | v26214 | VDRC | no effect | — |
| 20 | CG15286 | [15286R-3](https://shigen.nig.ac.jp/fly/nigfly/rnaiDetailAction.do?input=sr&stockId=15286R-3) | NigFly | no effect | — |
| 21 | CG31642 | [HMJ21895](https://shigen.nig.ac.jp/fly/nigfly/tripDetailAction.do?input=sr&tripNo=HMJ21895) | NigFly | no effect | — |
| 22 | CG31835 | [31835R-2](https://shigen.nig.ac.jp/fly/nigfly/rnaiDetailAction.do?input=sr&stockId=31835R-2) | NigFly | no effect | — |
| 23 | CG42585 | [HMJ23964](https://shigen.nig.ac.jp/fly/nigfly/tripDetailAction.do?input=sr&tripNo=HMJ23964) | NigFly | no effect | — |
| 24 | Kcmf1 | [11984R-2](https://shigen.nig.ac.jp/fly/nigfly/rnaiDetailAction.do?input=sr&stockId=11984R-2) | NigFly | no granules | — |
| **Other type** | 25 | CG3894 | 42618 | BDSC | no effect | — |
| 26 | CG7326 | [7326R-1](https://shigen.nig.ac.jp/fly/nigfly/rnaiDetailAction.do?input=sr&stockId=7326R-1) | NigFly | no effect | — |
| 27 | CG13994 | [13994R-2](https://shigen.nig.ac.jp/fly/nigfly/rnaiDetailAction.do?input=sr&stockId=13994R-2) | NigFly | no effect | — |
| 28 | CG14646 | [14646R-4](https://shigen.nig.ac.jp/fly/nigfly/rnaiDetailAction.do?input=sr&stockId=14646R-4) | NigFly | persisting GFP | variable effect |
| 29 | I-3 | v45386 | VDRC | no effect | — |
| 30 | Neurl4 | 44094 | BDSC | no effect | — |
| 31 | poe | [14472R-1](https://shigen.nig.ac.jp/fly/nigfly/rnaiDetailAction.do?input=sr&stockId=14472R-1) | NigFly | no effect | — |
| **Other Ring types** | 32 | Bre1 | [HMJ22277](https://shigen.nig.ac.jp/fly/nigfly/tripDetailAction.do?input=sr&tripNo=HMJ22277) | NigFly | no effect | — |
| 33 | Cbl | [7037R-1](https://shigen.nig.ac.jp/fly/nigfly/rnaiDetailAction.do?input=sr&stockId=7037R-1) | NigFly | no effect | — |
| 34 | CG1317 | [HMJ21301](https://shigen.nig.ac.jp/fly/nigfly/tripDetailAction.do?input=sr&tripNo=HMJ21301) | NigFly | no effect | — |
| 35 | CG1909 | [HMC02933](https://shigen.nig.ac.jp/fly/nigfly/tripDetailAction.do?input=sr&tripNo=HMC02933) | NigFly | no effect | — |
| 36 | CG2617 | [2617R-1](https://shigen.nig.ac.jp/fly/nigfly/rnaiDetailAction.do?input=sr&stockId=2617R-1) | NigFly | no effect | — |
| 37 | CG2617 | [HMJ21915](https://shigen.nig.ac.jp/fly/nigfly/tripDetailAction.do?input=sr&tripNo=HMJ21915) | NigFly | no effect | — |
| 38 | CG2681 | [2681R-1](https://shigen.nig.ac.jp/fly/nigfly/rnaiDetailAction.do?input=sr&stockId=2681R-1) | NigFly | no effect | — |
| 39 | CG2926 | [2926R-2](https://shigen.nig.ac.jp/fly/nigfly/rnaiDetailAction.do?input=sr&stockId=2926R-2) | NigFly | persisting GFP | very small gland |
| 40 | CG2991 | [2991R-3](https://shigen.nig.ac.jp/fly/nigfly/rnaiDetailAction.do?input=sr&stockId=2991R-3) | NigFly | no effect | — |
| 41 | CG4080 | [4080R-2](https://shigen.nig.ac.jp/fly/nigfly/rnaiDetailAction.do?input=sr&stockId=4080R-2) | NigFly | no effect | — |
| 42 | CG4325 | v34829 | VDRC | no effect | — |
| 43 | CG4813 | [4813R-1](https://shigen.nig.ac.jp/fly/nigfly/rnaiDetailAction.do?input=sr&stockId=6923Ra-3) | NigFly | persisting GFP | small granules |
| 44 | CG5071 | [5071R-1](https://shigen.nig.ac.jp/fly/nigfly/rnaiDetailAction.do?input=sr&stockId=7694R-1) | NigFly | no effect | — |
| 45 | CG5334 | [5334R-1](https://shigen.nig.ac.jp/fly/nigfly/tripDetailAction.do?input=sr&tripNo=HMJ23674) | NigFly | no effect | — |
| 46 | CG5347 | [5347R-1](https://shigen.nig.ac.jp/fly/nigfly/rnaiDetailAction.do?input=sr&stockId=8910R-3) | NigFly | persisting GFP | small granules |
| 47 | CG5382 | v101394 | VDRC | no effect | — |
| 48 | CG5555 | [5555R-2](https://shigen.nig.ac.jp/fly/nigfly/rnaiDetailAction.do?input=sr&stockId=9014R-1) | NigFly | persisting GFP | — |
| 49 | CG6752 | [6752R-1](https://shigen.nig.ac.jp/fly/nigfly/tripDetailAction.do?input=sr&tripNo=HMJ23874) | NigFly | no effect | — |
| 50 | CG6923 | [6923Ra-3](https://shigen.nig.ac.jp/fly/nigfly/tripDetailAction.do?input=sr&tripNo=HMJ23868) | NigFly | no effect | — |
| 51 | CG7376 | v35222 | VDRC | no effect | — |
| 52 | CG7694 | [7694R-1](https://shigen.nig.ac.jp/fly/nigfly/rnaiDetailAction.do?input=sr&stockId=7694R-1) | NigFly | no effect | — |
| 53 | CG8141 | [HMJ23674](https://shigen.nig.ac.jp/fly/nigfly/tripDetailAction.do?input=sr&tripNo=HMJ23674) | NigFly | no effect | — |
| 54 | CG8910 | [8910R-3](https://shigen.nig.ac.jp/fly/nigfly/rnaiDetailAction.do?input=sr&stockId=8910R-3) | NigFly | persisting GFP | variable effect,  small granules |
| 55 | CG8974 | not available | — | — | — |
| 56 | CG9014 | [9014R-1](https://shigen.nig.ac.jp/fly/nigfly/rnaiDetailAction.do?input=sr&stockId=9014R-1) | NigFly | no effect | — |
| 57 | CG9855 | [HMJ23874](https://shigen.nig.ac.jp/fly/nigfly/tripDetailAction.do?input=sr&tripNo=HMJ23874) | NigFly | no effect | — |
| 58 | CG9941 | v29596 | VDRC | no effect | — |
| 59 | CG10761 | v5474 | VDRC | no effect | — |
| 60 | CG10916 | [HMJ23868](https://shigen.nig.ac.jp/fly/nigfly/tripDetailAction.do?input=sr&tripNo=HMJ23868) | NigFly | no effect | — |
| 61 | CG11360 | [11360R-4](https://shigen.nig.ac.jp/fly/nigfly/rnaiDetailAction.do?input=sr&stockId=11360R-4) | NigFly | no effect | — |
| 62 | CG11414 | [11414R-3](https://shigen.nig.ac.jp/fly/nigfly/rnaiDetailAction.do?input=sr&stockId=11414R-3) | NigFly | no effect | — |
| 63 | CG12099 | v18734 | VDRC | no effect | — |
| 64 | CG12477 | v31944 | VDRC | no effect | — |
| 65 | CG13025 | [13025R-2](https://shigen.nig.ac.jp/fly/nigfly/rnaiDetailAction.do?input=sr&stockId=13025R-2) | NigFly | no effect | — |
| 66 | CG13344 | [13344R-2](https://shigen.nig.ac.jp/fly/nigfly/rnaiDetailAction.do?input=sr&stockId=13344R-2) | NigFly | no effect | — |
| 67 | CG13442 | [HMS01518](https://shigen.nig.ac.jp/fly/nigfly/tripDetailAction.do?input=sr&tripNo=HMS01518) | NigFly | no effect | — |
| 68 | CG13481 | v103527 | VDRC | no effect | — |
| 69 | CG13605 | v105112 | VDRC | no effect | — |
| 70 | CG14435 | [14435R-4](https://shigen.nig.ac.jp/fly/nigfly/rnaiDetailAction.do?input=sr&stockId=14435R-4) | NigFly | no granules | very small salivary gland |
| 71 | CG14983 | [HMJ23801](https://shigen.nig.ac.jp/fly/nigfly/tripDetailAction.do?input=sr&tripNo=HMJ23801) | NigFly | no effect | — |
| 72 | CG15011 | [15011R-3](https://shigen.nig.ac.jp/fly/nigfly/rnaiDetailAction.do?input=sr&stockId=15011R-3) | NigFly | no effect | — |
| 73 | CG15141 | [15141R-1](https://shigen.nig.ac.jp/fly/nigfly/rnaiDetailAction.do?input=sr&stockId=15141R-1) | NigFly | no effect | — |
| 74 | CG15814 | v30430 | VDRC | no effect | — |
| 75 | CG16781 | v7020 | VDRC | no effect | — |
| 76 | CG17019 | [17019R-6](https://shigen.nig.ac.jp/fly/nigfly/rnaiDetailAction.do?input=sr&stockId=17019R-6) | NigFly | no effect | — |
| 77 | CG17048 | v8780 | VDRC | no effect | — |
| 78 | CG17260 | [17260R-1](https://shigen.nig.ac.jp/fly/nigfly/rnaiDetailAction.do?input=sr&stockId=17260R-1) | NigFly | no effect | — |
| 79 | CG17329 | v19171 | VDRC | no effect | — |
| 80 | CG17717 | [17717R-2](https://shigen.nig.ac.jp/fly/nigfly/rnaiDetailAction.do?input=sr&stockId=17717R-2) | NigFly | no effect | — |
| 81 | CG17721 | v6036 | VDRC | no effect | — |
| 82 | CG17991 | [17991R-1](https://shigen.nig.ac.jp/fly/nigfly/rnaiDetailAction.do?input=sr&stockId=17991R-1) | NigFly | no effect | — |
| 83 | CG31807 | [31807R-2](https://shigen.nig.ac.jp/fly/nigfly/rnaiDetailAction.do?input=sr&stockId=31807R-2) | NigFly | no effect | — |
| 84 | CG32369 | 64028 | BDSC | no effect | — |
| 85 | CG32581 | not available | — | — | — |
| 86 | CG32847 | v48423 | VDRC | no effect | — |
| 87 | CG32850 | [HMJ22085](https://shigen.nig.ac.jp/fly/nigfly/tripDetailAction.do?input=sr&tripNo=HMJ22085) | NigFly | no effect | — |
| 88 | CG33552 | [HMJ23596](https://shigen.nig.ac.jp/fly/nigfly/tripDetailAction.do?input=sr&tripNo=HMJ23596) | NigFly | no effect | — |
| 89 | CG34289 | [HMJ21306](https://shigen.nig.ac.jp/fly/nigfly/tripDetailAction.do?input=sr&tripNo=HMJ21306) | NigFly | no effect | — |
| 90 | CG34308 | not available | — | — | — |
| 91 | CG34375 | [13835R-2](https://shigen.nig.ac.jp/fly/nigfly/rnaiDetailAction.do?input=sr&stockId=13835R-2) | NigFly | no effect | — |
| 92 | Cnot4 | [31716R-1](https://shigen.nig.ac.jp/fly/nigfly/rnaiDetailAction.do?input=sr&stockId=31716R-1) | NigFly | persisting GFP | — |
| 93 | Cnot4 | v10850 | VDRC | persisting GFP | — |
| 94 | d4 | [2682R-1](https://shigen.nig.ac.jp/fly/nigfly/rnaiDetailAction.do?input=sr&stockId=2682R-1) | NigFly | persisting GFP | — |
| 95 | dgrn | [10981R-3](https://shigen.nig.ac.jp/fly/nigfly/rnaiDetailAction.do?input=sr&stockId=10981R-3) | NigFly | no effect | — |
| 96 | dnr1 | [12489R-1](https://shigen.nig.ac.jp/fly/nigfly/rnaiDetailAction.do?input=sr&stockId=12489R-1) | NigFly | persisting GFP | small granules |
| 97 | dor | [3093R-2](https://shigen.nig.ac.jp/fly/nigfly/rnaiDetailAction.do?input=sr&stockId=3093R-2) | NigFly | persisting GFP | — |
| 98 | dx | [3929R-1](https://shigen.nig.ac.jp/fly/nigfly/rnaiDetailAction.do?input=sr&stockId=3929R-1) | NigFly | no effect | — |
| 99 | elfless | [15150R-1](https://shigen.nig.ac.jp/fly/nigfly/rnaiDetailAction.do?input=sr&stockId=15150R-1) | NigFly | no effect | — |
| 100 | elgi | [17033R-3](https://shigen.nig.ac.jp/fly/nigfly/rnaiDetailAction.do?input=sr&stockId=17033R-3) | NigFly | no effect | — |
| 101 | Fancl | [12812R-1](https://shigen.nig.ac.jp/fly/nigfly/rnaiDetailAction.do?input=sr&stockId=12812R-1) | NigFly | no effect | — |
| 102 | Ltn1 | [9268R-3](https://shigen.nig.ac.jp/fly/nigfly/rnaiDetailAction.do?input=sr&stockId=9268R-3) | NigFly | no effect | — |
| 103 | Mat1 | [7614R-1](https://shigen.nig.ac.jp/fly/nigfly/rnaiDetailAction.do?input=sr&stockId=7614R-1) | NigFly | no effect | — |
| 104 | mdlc | [4973R-1](https://shigen.nig.ac.jp/fly/nigfly/rnaiDetailAction.do?input=sr&stockId=4973R-1) | NigFly | no effect | — |
| 105 | Hakai | [2LG-0654](https://shigen.nig.ac.jp/fly/nigfly/grnaDetailAction.do?input=sr&stockId=2LG-0654) | NigFly | no effect | — |
| 106 | hiw | 28031 | BDSC | no effect | — |
| 107 | Iru | [11982R-3](https://shigen.nig.ac.jp/fly/nigfly/rnaiDetailAction.do?input=sr&stockId=11982R-3) | NigFly | no effect | — |
| 108 | CG4195 | [4195R-1](https://shigen.nig.ac.jp/fly/nigfly/rnaiDetailAction.do?input=sr&stockId=4195R-1) | NigFly | no effect | — |
| 109 | ImgA | [2LG-0313](https://shigen.nig.ac.jp/fly/nigfly/grnaDetailAction.do?input=sr&stockId=2LG-0313) | NigFly | no effect | — |
| 110 | Lpt | 25994 | BDSC | no effect | — |
| 111 | lt | [18028R-2](https://shigen.nig.ac.jp/fly/nigfly/rnaiDetailAction.do?input=sr&stockId=18028R-2) | NigFly | persisting GFP | — |
| 112 | Mi-2 | [HMS00301](https://shigen.nig.ac.jp/fly/nigfly/tripDetailAction.do?input=sr&tripNo=HMS00301) | NigFly | no effect | — |
| 113 | mib1 | 27320 | BDSC | no effect | — |
| 114 | mib2 | [HMJ21843](https://shigen.nig.ac.jp/fly/nigfly/tripDetailAction.do?input=sr&tripNo=HMJ21843) | NigFly | no effect | — |
| 115 | Mkrn1 | v34373 | VDRC | no effect | — |
| 116 | msl-2 | 31627 | BDSC | no effect | — |
| 117 | Mul1 | [1134R-2](https://shigen.nig.ac.jp/fly/nigfly/rnaiDetailAction.do?input=sr&stockId=1134R-2) | NigFly | no effect | — |
| 118 | Mura | [GL00121](https://shigen.nig.ac.jp/fly/nigfly/tripDetailAction.do?input=sr&tripNo=GL00121) | NigFly | no effect | — |
| 119 | neur | [11988R-1](https://shigen.nig.ac.jp/fly/nigfly/rnaiDetailAction.do?input=sr&stockId=11988R-1) | NigFly | no effect | — |
| 120 | nopo | v22013 | VDRC | no effect | — |
| 121 | Nse1 | [2LG-0755](https://shigen.nig.ac.jp/fly/nigfly/grnaDetailAction.do?input=sr&stockId=2LG-0755) | NigFly | no effect | — |
| 122 | Pex2 | [7081R-2](https://shigen.nig.ac.jp/fly/nigfly/rnaiDetailAction.do?input=sr&stockId=7081R-2) | NigFly | no effect | — |
| 123 | Pex10 | v46613 | VDRC | no effect | — |
| 124 | Pex12 | [3639R-1](https://shigen.nig.ac.jp/fly/nigfly/rnaiDetailAction.do?input=sr&stockId=3639R-1) | NigFly | no effect | — |
| 125 | Pli | [5212R-3](https://shigen.nig.ac.jp/fly/nigfly/rnaiDetailAction.do?input=sr&stockId=5212R-3) | NigFly | no effect | — |
| 126 | POSH | [4909R-1](https://shigen.nig.ac.jp/fly/nigfly/rnaiDetailAction.do?input=sr&stockId=4909R-1) | NigFly | no effect | — |
| 127 | Psc | [3886R-1](https://shigen.nig.ac.jp/fly/nigfly/rnaiDetailAction.do?input=sr&stockId=3886R-1) | NigFly | no effect | — |
| 128 | qin | [HMJ21020](https://shigen.nig.ac.jp/fly/nigfly/tripDetailAction.do?input=sr&tripNo=HMJ21020) | NigFly | no effect | — |
| 129 | Rbpn-5 | [4030R-3](https://shigen.nig.ac.jp/fly/nigfly/rnaiDetailAction.do?input=sr&stockId=4030R-3) | NigFly | no effect | — |
| 130 | Rchy1 | [HMJ22014](https://shigen.nig.ac.jp/fly/nigfly/tripDetailAction.do?input=sr&tripNo=HMJ22014) | NigFly | no effect | — |
| 131 | Rnf146 | [8786R-4](https://shigen.nig.ac.jp/fly/nigfly/rnaiDetailAction.do?input=sr&stockId=8786R-4) | NigFly | no effect | — |
| 132 | roq | [HMJ21890](https://shigen.nig.ac.jp/fly/nigfly/tripDetailAction.do?input=sr&tripNo=HMJ21890) | NigFly | no effect | — |
| 133 | Sce | [5595R-1](https://shigen.nig.ac.jp/fly/nigfly/rnaiDetailAction.do?input=sr&stockId=5595R-1) | NigFly | persisting GFP | very few and small granules |
| 134 | sina | [9949R-1](https://shigen.nig.ac.jp/fly/nigfly/rnaiDetailAction.do?input=sr&stockId=9949R-1) | NigFly | no effect | — |
| 135 | sinah | [13030R-2](https://shigen.nig.ac.jp/fly/nigfly/rnaiDetailAction.do?input=sr&stockId=13030R-2) | NigFly | no effect | — |
| 136 | sip3 | [1937R-3](https://shigen.nig.ac.jp/fly/nigfly/rnaiDetailAction.do?input=sr&stockId=1937R-3) | NigFly | no effect | — |
| 137 | snama | [3231R-3](https://shigen.nig.ac.jp/fly/nigfly/rnaiDetailAction.do?input=sr&stockId=3231R-3) | NigFly | no effect | — |
| 138 | snky | [HMJ21388](https://shigen.nig.ac.jp/fly/nigfly/tripDetailAction.do?input=sr&tripNo=HMJ21388) | NigFly | no effect | — |
| 139 | stc | [HMS02768](https://shigen.nig.ac.jp/fly/nigfly/tripDetailAction.do?input=sr&tripNo=HMS02768) | NigFly | no effect | — |
| 140 | Su(z)2 | [HMS00281](https://shigen.nig.ac.jp/fly/nigfly/tripDetailAction.do?input=sr&tripNo=HMS00281) | NigFly | no effect | — |
| 141 | Topors | [15104R-2](https://shigen.nig.ac.jp/fly/nigfly/rnaiDetailAction.do?input=sr&stockId=15104R-2) | NigFly | no effect | — |
| 142 | Traf6 | [10961R-1](https://shigen.nig.ac.jp/fly/nigfly/rnaiDetailAction.do?input=sr&stockId=10961R-1) | NigFly | no effect | — |
| 143 | Trc8 | v4449 | VDRC | no effect | — |
| 144 | trx | [HMS00580](https://shigen.nig.ac.jp/fly/nigfly/rnaiDetailAction.do?input=sr&stockId=5709R-1) | NigFly | no effect | — |
| 145 | Ubr1 | [9086R-3](https://shigen.nig.ac.jp/fly/nigfly/rnaiDetailAction.do?input=sr&stockId=12362R-1) | NigFly | no effect | — |
| 146 | Ubr3 | v22901 | VDRC | no effect | — |
| 147 | Unk | 57026 | BDSC | no effect | — |
| 148 | Vps8 | [10144R-2](https://shigen.nig.ac.jp/fly/nigfly/rnaiDetailAction.do?input=sr&stockId=11321R-3) | NigFly | no effect | — |
| 149 | Vps11 | v24731 | VDRC | persisting GFP | — |
| 150 | ari-1 | 29416 | BDSC | no effect | — |
| **Ring btw Ring** | 151 | ari-2 | [5709R-1](https://shigen.nig.ac.jp/fly/nigfly/rnaiDetailAction.do?input=sr&stockId=10523R-2) | NigFly | no effect | — |
| 152 | CG12362 | [12362R-1](https://shigen.nig.ac.jp/fly/nigfly/rnaiDetailAction.do?input=sr&stockId=12362R-1) | NigFly | no effect | — |
| 153 | CG33144 | 64033 | BDSC | no effect | — |
| 154 | LUBEL | [11321R-3](https://shigen.nig.ac.jp/fly/nigfly/rnaiDetailAction.do?input=sr&stockId=11321R-3) | NigFly | no effect | — |
| 155 | park | [10523R-2](https://shigen.nig.ac.jp/fly/nigfly/rnaiDetailAction.do?input=sr&stockId=10523R-2) | NigFly | no effect | — |
| **Roc types** | 156 | Roc1a | [HMS00353](https://shigen.nig.ac.jp/fly/nigfly/tripDetailAction.do?input=sr&tripNo=HMS00353) | NigFly | no effect | — |
| 157 | Roc1b | 31067 | BDSC | no effect | — |
| 158 | Roc2 | v28103 | VDRC | no effect | — |
| **Trim types** | 159 | bon | 27047 | BDSC | no effect | — |
| 160 | CG8419 | v107626 | VDRC | no effect | — |
| 161 | mei-P26 | [12218R-1](https://shigen.nig.ac.jp/fly/nigfly/rnaiDetailAction.do?input=sr&stockId=12218R-1) | NigFly | no effect | — |
| 162 | tn | [HMS02508](https://shigen.nig.ac.jp/fly/nigfly/tripDetailAction.do?input=sr&tripNo=HMS02508) | NigFly | no effect | — |
| 163 | Trim9 | [31721R-2](https://shigen.nig.ac.jp/fly/nigfly/rnaiDetailAction.do?input=sr&stockId=31721R-2) | NigFly | no effect | — |
| **U-box types** | 164 | CG2218 | [2218R-4](https://shigen.nig.ac.jp/fly/nigfly/rnaiDetailAction.do?input=sr&stockId=2218R-4) | NigFly | no effect | — |
| 165 | CG6197 | [6179R-1](https://shigen.nig.ac.jp/fly/nigfly/rnaiDetailAction.do?input=sr&stockId=6179R-1) | NigFly | no effect | — |
| 166 | CG7747 | v44854 | VDRC | no effect | — |
| 167 | CG9934 | [HMJ21044](https://shigen.nig.ac.jp/fly/nigfly/tripDetailAction.do?input=sr&tripNo=HMJ21044) | NigFly | no effect | — |
| 168 | CG11070 | v110416 | VDRC | no effect | — |
| 169 | Prp19 | [5519R-1](https://shigen.nig.ac.jp/fly/nigfly/rnaiDetailAction.do?input=sr&stockId=5519R-1) | NigFly | no effect | — |
| 170 | STUB1 | [5203R-3](https://shigen.nig.ac.jp/fly/nigfly/rnaiDetailAction.do?input=sr&stockId=5203R-3) | NigFly | no effect | — |
